# Supplementary material for: The ST22 chronology for the Skytrain Ice Rise ice core – part 1: A stratigraphic chronology of the last 2000 years
Source: Copernicus journal article supplement (doi:10.5194/cp-2022-28), 2022-03-23
Supplement: Supplementary file 1 [file alc_Skytrain_220131.xlsx]

## Sheet: Skytrain Chronology 2000 BP
Depth absolute [m]	Age [yB 1950 AD]	error [y]	Age AD	layer thickness absolute [m]
0.04	-68	1.05	2018	0.551
0.591	-67	1.1	2017	0.588
1.179	-66	1.15	2016	0.27
1.449	-65	1.2	2015	0.337
1.786	-64	1.25	2014	0.326
2.112	-63	1.3	2013	0.218
2.33	-62	1.35	2012	0.305
2.635	-61	1.4	2011	0.274
2.909	-60	1.45	2010	0.445
3.354	-59	1.5	2009	0.195
3.549	-58	1.55	2008	0.241
3.79	-57	1.6	2007	0.24
4.03	-56	1.65	2006	0.16
4.19	-55	1.7	2005	0.167
4.357	-54	1.75	2004	0.325
4.682	-53	1.8	2003	0.26
4.942	-52	1.85	2002	0.323
5.265	-51	1.9	2001	0.292
5.557	-50	1.95	2000	0.227
5.784	-49	2	1999	0.178
5.962	-48	2.05	1998	0.341
6.303	-47	2.1	1997	0.293
6.596	-46	2.15	1996	0.309
6.905	-45	2.2	1995	0.246
7.151	-44	2.25	1994	0.285
7.436	-43	2.3	1993	0.394
7.83	-42	2.3	1992	0.288
8.118	-41	2.3	1991	0.149
8.267	-40	2.25	1990	0.2
8.467	-39	2.2	1989	0.364
8.831	-38	2.15	1988	0.309
9.14	-37	2.1	1987	0.194
9.334	-36	2.05	1986	0.194
9.528	-35	2	1985	0.284
9.812	-34	1.95	1984	0.261
10.073	-33	1.9	1983	0.27
10.343	-32	1.85	1982	0.324
10.667	-31	1.8	1981	0.291
10.958	-30	1.75	1980	0.09
11.048	-29	1.7	1979	0.226
11.274	-28	1.65	1978	0.295
11.569	-27	1.6	1977	0.227
11.796	-26	1.55	1976	0.219
12.015	-25	1.5	1975	0.288
12.303	-24	1.45	1974	0.26
12.563	-23	1.4	1973	0.153
12.716	-22	1.35	1972	0.226
12.942	-21	1.3	1971	0.172
13.114	-20	1.25	1970	0.18
13.294	-19	1.2	1969	0.23
13.524	-18	1.15	1968	0.185
13.709	-17	1.1	1967	0.173
13.882	-16	1.05	1966	0.108
13.99	-15	1	1965	0.146
14.136	-14	1.05	1964	0.089
14.225	-13	1.1	1963	0.266
14.491	-12	1.15	1962	0.233
14.724	-11	1.2	1961	0.226
14.95	-10	1.25	1960	0.269
15.219	-9	1.3	1959	0.141
15.36	-8	1.35	1958	0.101
15.461	-7	1.4	1957	0.123
15.584	-6	1.45	1956	0.112
15.696	-5	1.5	1955	0.204
15.9	-4	1.55	1954	0.118
16.018	-3	1.6	1953	0.107
16.125	-2	1.65	1952	0.166
16.291	-1	1.7	1951	0.125
16.416	0	1.75	1950	0.195
16.611	1	1.8	1949	0.158
16.769	2	1.85	1948	0.122
16.891	3	1.9	1947	0.121
17.012	4	1.95	1946	0.15
17.162	5	2	1945	0.295
17.457	6	2.05	1944	0.155
17.612	7	2.1	1943	0.232
17.844	8	2.15	1942	0.134
17.978	9	2.2	1941	0.135
18.113	10	2.25	1940	0.118
18.231	11	2.3	1939	0.106
18.337	12	2.35	1938	0.195
18.532	13	2.4	1937	0.193
18.725	14	2.45	1936	0.164
18.889	15	2.5	1935	0.263
19.152	16	2.55	1934	0.096
19.248	17	2.6	1933	0.184
19.432	18	2.65	1932	0.274
19.706	19	2.7	1931	0.143
19.849	20	2.75	1930	0.164
20.013	21	2.8	1929	0.186
20.199	22	2.85	1928	0.109
20.308	23	2.9	1927	0.194
20.502	24	2.95	1926	0.259
20.761	25	3	1925	0.19
20.951	26	3.05	1924	0.258
21.209	27	3.1	1923	0.144
21.353	28	3.15	1922	0.109
21.462	29	3.2	1921	0.261
21.723	30	3.25	1920	0.184
21.907	31	3.3	1919	0.081
21.988	32	3.35	1918	0.142
22.13	33	3.4	1917	0.149
22.279	34	3.45	1916	0.17
22.449	35	3.5	1915	0.136
22.585	36	3.55	1914	0.116
22.701	37	3.6	1913	0.205
22.906	38	3.65	1912	0.147
23.053	39	3.7	1911	0.136
23.189	40	3.75	1910	0.276
23.465	41	3.8	1909	0.092
23.557	42	3.85	1908	0.185
23.742	43	3.9	1907	0.13
23.872	44	3.95	1906	0.17
24.042	45	4	1905	0.112
24.154	46	4.05	1904	0.172
24.326	47	4.1	1903	0.091
24.417	48	4.15	1902	0.134
24.551	49	4.2	1901	0.127
24.678	50	4.25	1900	0.124
24.802	51	4.3	1899	0.248
25.05	52	4.35	1898	0.134
25.184	53	4.4	1897	0.279
25.463	54	4.45	1896	0.172
25.635	55	4.5	1895	0.239
25.874	56	4.55	1894	0.348
26.222	57	4.6	1893	0.205
26.427	58	4.65	1892	0.268
26.695	59	4.7	1891	0.153
26.848	60	4.75	1890	0.108
26.956	61	4.7	1889	0.064
27.02	62	4.65	1888	0.174
27.194	63	4.6	1887	0.207
27.401	64	4.55	1886	0.105
27.506	65	4.5	1885	0.237
27.743	66	4.45	1884	0.175
27.918	67	4.4	1883	0.232
28.15	68	4.35	1882	0.377
28.527	69	4.3	1881	0.162
28.689	70	4.25	1880	0.143
28.832	71	4.2	1879	0.093
28.925	72	4.15	1878	0.155
29.08	73	4.1	1877	0.198
29.278	74	4.05	1876	0.091
29.369	75	4	1875	0.137
29.506	76	3.95	1874	0.125
29.631	77	3.9	1873	0.118
29.749	78	3.85	1872	0.164
29.913	79	3.8	1871	0.114
30.027	80	3.75	1870	0.175
30.202	81	3.7	1869	0.107
30.309	82	3.65	1868	0.074
30.383	83	3.6	1867	0.12
30.503	84	3.55	1866	0.244
30.747	85	3.5	1865	0.178
30.925	86	3.45	1864	0.124
31.049	87	3.4	1863	0.298
31.347	88	3.35	1862	0.122
31.469	89	3.3	1861	0.122
31.591	90	3.25	1860	0.163
31.754	91	3.2	1859	0.224
31.978	92	3.15	1858	0.068
32.046	93	3.1	1857	0.128
32.174	94	3.05	1856	0.123
32.297	95	3	1855	0.199
32.496	96	2.95	1854	0.227
32.723	97	2.9	1853	0.084
32.807	98	2.85	1852	0.131
32.938	99	2.8	1851	0.087
33.025	100	2.75	1850	0.209
33.234	101	2.7	1849	0.19
33.424	102	2.65	1848	0.122
33.546	103	2.6	1847	0.184
33.73	104	2.55	1846	0.131
33.861	105	2.5	1845	0.11
33.971	106	2.45	1844	0.164
34.135	107	2.4	1843	0.201
34.336	108	2.35	1842	0.129
34.465	109	2.3	1841	0.178
34.643	110	2.25	1840	0.171
34.814	111	2.2	1839	0.128
34.942	112	2.15	1838	0.088
35.03	113	2.1	1837	0.106
35.136	114	2.05	1836	0.151
35.287	115	2	1835	0.168
35.455	116	1.95	1834	0.18
35.635	117	1.9	1833	0.131
35.766	118	1.85	1832	0.261
36.027	119	1.8	1831	0.155
36.182	120	1.75	1830	0.117
36.299	121	1.7	1829	0.187
36.486	122	1.65	1828	0.194
36.68	123	1.6	1827	0.109
36.789	124	1.55	1826	0.144
36.933	125	1.5	1825	0.161
37.094	126	1.45	1824	0.144
37.238	127	1.4	1823	0.135
37.373	128	1.35	1822	0.202
37.575	129	1.3	1821	0.136
37.711	130	1.25	1820	0.084
37.795	131	1.2	1819	0.15
37.945	132	1.15	1818	0.121
38.066	133	1.1	1817	0.094
38.16	134	1.05	1816	0.098
38.258	135	1	1815	0.101
38.359	136	1.08	1814	0.166
38.525	137	1.16	1813	0.203
38.728	138	1.24	1812	0.185
38.913	139	1.32	1811	0.067
38.98	140	1.4	1810	0.11
39.09	141	1.48	1809	0.116
39.206	142	1.56	1808	0.111
39.317	143	1.64	1807	0.173
39.49	144	1.72	1806	0.131
39.621	145	1.8	1805	0.128
39.749	146	1.88	1804	0.109
39.858	147	1.96	1803	0.076
39.934	148	2.04	1802	0.115
40.049	149	2.12	1801	0.125
40.174	150	2.2	1800	0.133
40.307	151	2.28	1799	0.107
40.414	152	2.36	1798	0.16
40.574	153	2.44	1797	0.065
40.639	154	2.52	1796	0.14
40.779	155	2.6	1795	0.047
40.826	156	2.68	1794	0.151
40.977	157	2.76	1793	0.203
41.18	158	2.84	1792	0.081
41.261	159	2.92	1791	0.139
41.4	160	3	1790	0.067
41.467	161	3.08	1789	0.09
41.557	162	3.16	1788	0.105
41.662	163	3.24	1787	0.091
41.753	164	3.32	1786	0.104
41.857	165	3.4	1785	0.118
41.975	166	3.48	1784	0.159
42.134	167	3.56	1783	0.132
42.266	168	3.64	1782	0.064
42.33	169	3.72	1781	0.11
42.44	170	3.8	1780	0.135
42.575	171	3.88	1779	0.096
42.671	172	3.96	1778	0.059
42.73	173	4.04	1777	0.094
42.824	174	4.12	1776	0.13
42.954	175	4.2	1775	0.081
43.035	176	4.28	1774	0.068
43.103	177	4.36	1773	0.114
43.217	178	4.44	1772	0.057
43.274	179	4.52	1771	0.095
43.369	180	4.6	1770	0.098
43.467	181	4.68	1769	0.129
43.596	182	4.76	1768	0.072
43.668	183	4.84	1767	0.183
43.851	184	4.92	1766	0.088
43.939	185	5	1765	0.174
44.113	186	5.08	1764	0.067
44.18	187	5.16	1763	0.078
44.258	188	5.24	1762	0.121
44.379	189	5.32	1761	0.191
44.57	190	5.4	1760	0.106
44.676	191	5.48	1759	0.103
44.779	192	5.56	1758	0.073
44.852	193	5.64	1757	0.064
44.916	194	5.72	1756	0.127
45.043	195	5.8	1755	0.053
45.096	196	5.88	1754	0.069
45.165	197	5.96	1753	0.065
45.23	198	6.04	1752	0.073
45.303	199	6.12	1751	0.109
45.412	200	6.2	1750	0.108
45.52	201	6.28	1749	0.095
45.615	202	6.36	1748	0.194
45.809	203	6.44	1747	0.121
45.93	204	6.52	1746	0.193
46.123	205	6.6	1745	0.117
46.24	206	6.68	1744	0.098
46.338	207	6.76	1743	0.172
46.51	208	6.84	1742	0.158
46.668	209	6.92	1741	0.092
46.76	210	7	1740	0.108
46.868	211	7.08	1739	0.106
46.974	212	7.16	1738	0.067
47.041	213	7.24	1737	0.213
47.254	214	7.32	1736	0.082
47.336	215	7.4	1735	0.064
47.4	216	7.48	1734	0.202
47.602	217	7.56	1733	0.163
47.765	218	7.64	1732	0.114
47.879	219	7.72	1731	0.092
47.971	220	7.8	1730	0.116
48.087	221	7.88	1729	0.171
48.258	222	7.96	1728	0.084
48.342	223	8.04	1727	0.083
48.425	224	8.12	1726	0.155
48.58	225	8.2	1725	0.067
48.647	226	8.28	1724	0.165
48.812	227	8.36	1723	0.065
48.877	228	8.44	1722	0.095
48.972	229	8.52	1721	0.068
49.04	230	8.6	1720	0.151
49.191	231	8.68	1719	0.211
49.402	232	8.76	1718	0.142
49.544	233	8.84	1717	0.123
49.667	234	8.92	1716	0.178
49.845	235	9	1715	0.12
49.965	236	9.08	1714	0.21
50.175	237	9.16	1713	0.139
50.314	238	9.24	1712	0.221
50.535	239	9.32	1711	0.061
50.596	240	9.4	1710	0.046
50.642	241	9.48	1709	0.114
50.756	242	9.56	1708	0.146
50.902	243	9.64	1707	0.258
51.16	244	9.72	1706	0.113
51.273	245	9.8	1705	0.119
51.392	246	9.88	1704	0.106
51.498	247	9.96	1703	0.102
51.6	248	10.04	1702	0.118
51.718	249	10.12	1701	0.12
51.838	250	10.2	1700	0.085
51.923	251	10.28	1699	0.106
52.029	252	10.36	1698	0.108
52.137	253	10.44	1697	0.096
52.233	254	10.52	1696	0.183
52.416	255	10.6	1695	0.077
52.493	256	10.68	1694	0.183
52.676	257	10.76	1693	0.095
52.771	258	10.84	1692	0.067
52.838	259	10.92	1691	0.091
52.929	260	11	1690	0.143
53.072	261	11.08	1689	0.138
53.21	262	11.16	1688	0.112
53.322	263	11.24	1687	0.064
53.386	264	11.32	1686	0.137
53.523	265	11.4	1685	0.055
53.578	266	11.48	1684	0.152
53.73	267	11.56	1683	0.112
53.842	268	11.64	1682	0.123
53.965	269	11.72	1681	0.142
54.107	270	11.8	1680	0.168
54.275	271	11.88	1679	0.12
54.395	272	11.96	1678	0.107
54.502	273	12.04	1677	0.109
54.611	274	12.12	1676	0.093
54.704	275	12.2	1675	0.073
54.777	276	12.28	1674	0.174
54.951	277	12.36	1673	0.082
55.033	278	12.44	1672	0.065
55.098	279	12.52	1671	0.125
55.223	280	12.6	1670	0.079
55.302	281	12.68	1669	0.123
55.425	282	12.76	1668	0.148
55.573	283	12.84	1667	0.064
55.637	284	12.92	1666	0.137
55.774	285	13	1665	0.093
55.867	286	13.08	1664	0.086
55.953	287	13.16	1663	0.169
56.122	288	13.24	1662	0.204
56.326	289	13.32	1661	0.133
56.459	290	13.4	1660	0.143
56.602	291	13.48	1659	0.155
56.757	292	13.56	1658	0.143
56.9	293	13.64	1657	0.074
56.974	294	13.72	1656	0.09
57.064	295	13.8	1655	0.055
57.119	296	13.88	1654	0.092
57.211	297	13.96	1653	0.117
57.328	298	14.04	1652	0.271
57.599	299	14.12	1651	0.126
57.725	300	14.2	1650	0.117
57.842	301	14.28	1649	0.076
57.918	302	14.36	1648	0.087
58.005	303	14.44	1647	0.049
58.054	304	14.52	1646	0.138
58.192	305	14.6	1645	0.089
58.281	306	14.68	1644	0.094
58.375	307	14.76	1643	0.104
58.479	308	14.84	1642	0.111
58.59	309	14.92	1641	0.114
58.704	310	15	1640	0.096
58.8	311	15.08	1639	0.06
58.86	312	15.16	1638	0.081
58.941	313	15.24	1637	0.154
59.095	314	15.32	1636	0.071
59.166	315	15.4	1635	0.077
59.243	316	15.48	1634	0.101
59.344	317	15.56	1633	0.066
59.41	318	15.64	1632	0.1
59.51	319	15.72	1631	0.211
59.721	320	15.8	1630	0.143
59.864	321	15.88	1629	0.103
59.967	322	15.96	1628	0.041
60.008	323	16.04	1627	0.115
60.123	324	16.12	1626	0.076
60.199	325	16.2	1625	0.217
60.416	326	16.28	1624	0.139
60.555	327	16.36	1623	0.168
60.723	328	16.44	1622	0.215
60.938	329	16.52	1621	0.077
61.015	330	16.6	1620	0.111
61.126	331	16.68	1619	0.103
61.229	332	16.76	1618	0.125
61.354	333	16.84	1617	0.151
61.505	334	16.92	1616	0.1
61.605	335	17	1615	0.049
61.654	336	17.08	1614	0.077
61.731	337	17.16	1613	0.098
61.829	338	17.24	1612	0.102
61.931	339	17.32	1611	0.03
61.961	340	17.4	1610	0.1
62.061	341	17.48	1609	0.072
62.133	342	17.56	1608	0.137
62.27	343	17.64	1607	0.113
62.383	344	17.72	1606	0.056
62.439	345	17.8	1605	0.071
62.51	346	17.88	1604	0.105
62.615	347	17.96	1603	0.076
62.691	348	18.04	1602	0.068
62.759	349	18.12	1601	0.063
62.822	350	18.2	1600	0.138
62.96	351	18.28	1599	0.222
63.182	352	18.36	1598	0.083
63.265	353	18.44	1597	0.071
63.336	354	18.52	1596	0.08
63.416	355	18.6	1595	0.11
63.526	356	18.68	1594	0.141
63.667	357	18.76	1593	0.089
63.756	358	18.84	1592	0.103
63.859	359	18.92	1591	0.074
63.933	360	19	1590	0.122
64.055	361	19.08	1589	0.068
64.123	362	19.16	1588	0.086
64.209	363	19.24	1587	0.066
64.275	364	19.32	1586	0.087
64.362	365	19.4	1585	0.058
64.42	366	19.48	1584	0.084
64.504	367	19.56	1583	0.063
64.567	368	19.64	1582	0.099
64.666	369	19.72	1581	0.061
64.727	370	19.8	1580	0.066
64.793	371	19.88	1579	0.139
64.932	372	19.96	1578	0.154
65.086	373	20.04	1577	0.105
65.191	374	20.12	1576	0.082
65.273	375	20.2	1575	0.14
65.413	376	20.28	1574	0.089
65.502	377	20.36	1573	0.098
65.6	378	20.44	1572	0.064
65.664	379	20.52	1571	0.078
65.742	380	20.6	1570	0.053
65.795	381	20.68	1569	0.062
65.857	382	20.76	1568	0.131
65.988	383	20.84	1567	0.063
66.051	384	20.92	1566	0.074
66.125	385	21	1565	0.097
66.222	386	21.08	1564	0.149
66.371	387	21.16	1563	0.138
66.509	388	21.24	1562	0.063
66.572	389	21.32	1561	0.229
66.801	390	21.4	1560	0.088
66.889	391	21.48	1559	0.054
66.943	392	21.56	1558	0.033
66.976	393	21.64	1557	0.052
67.028	394	21.72	1556	0.062
67.09	395	21.8	1555	0.053
67.143	396	21.88	1554	0.051
67.194	397	21.96	1553	0.076
67.27	398	22.04	1552	0.085
67.355	399	22.12	1551	0.056
67.411	400	22.2	1550	0.159
67.57	401	22.12	1549	0.125
67.695	402	22.04	1548	0.042
67.737	403	21.96	1547	0.11
67.847	404	21.88	1546	0.064
67.911	405	21.8	1545	0.103
68.014	406	21.72	1544	0.12
68.134	407	21.64	1543	0.132
68.266	408	21.56	1542	0.121
68.387	409	21.48	1541	0.056
68.443	410	21.4	1540	0.058
68.501	411	21.32	1539	0.075
68.576	412	21.24	1538	0.125
68.701	413	21.16	1537	0.055
68.756	414	21.08	1536	0.077
68.833	415	21	1535	0.137
68.97	416	20.92	1534	0.083
69.053	417	20.84	1533	0.194
69.247	418	20.76	1532	0.091
69.338	419	20.68	1531	0.096
69.434	420	20.6	1530	0.077
69.511	421	20.52	1529	0.11
69.621	422	20.44	1528	0.105
69.726	423	20.36	1527	0.213
69.939	424	20.28	1526	0.096
70.035	425	20.2	1525	0.069
70.104	426	20.12	1524	0.107
70.211	427	20.04	1523	0.123
70.334	428	19.96	1522	0.073
70.407	429	19.88	1521	0.042
70.449	430	19.8	1520	0.088
70.537	431	19.72	1519	0.061
70.598	432	19.64	1518	0.097
70.695	433	19.56	1517	0.047
70.742	434	19.48	1516	0.059
70.801	435	19.4	1515	0.167
70.968	436	19.32	1514	0.082
71.05	437	19.24	1513	0.154
71.204	438	19.16	1512	0.151
71.355	439	19.08	1511	0.106
71.461	440	19	1510	0.126
71.587	441	18.92	1509	0.088
71.675	442	18.84	1508	0.093
71.768	443	18.76	1507	0.101
71.869	444	18.68	1506	0.053
71.922	445	18.6	1505	0.055
71.977	446	18.52	1504	0.04
72.017	447	18.44	1503	0.091
72.108	448	18.36	1502	0.055
72.163	449	18.28	1501	0.058
72.221	450	18.2	1500	0.052
72.273	451	18.12	1499	0.047
72.32	452	18.04	1498	0.104
72.424	453	17.96	1497	0.089
72.513	454	17.88	1496	0.124
72.637	455	17.8	1495	0.095
72.732	456	17.72	1494	0.085
72.817	457	17.64	1493	0.157
72.974	458	17.56	1492	0.063
73.037	459	17.48	1491	0.068
73.105	460	17.4	1490	0.123
73.228	461	17.32	1489	0.122
73.35	462	17.24	1488	0.141
73.491	463	17.16	1487	0.066
73.557	464	17.08	1486	0.052
73.609	465	17	1485	0.153
73.762	466	16.92	1484	0.074
73.836	467	16.84	1483	0.113
73.949	468	16.76	1482	0.175
74.124	469	16.68	1481	0.07
74.194	470	16.6	1480	0.13
74.324	471	16.52	1479	0.096
74.42	472	16.44	1478	0.121
74.541	473	16.36	1477	0.096
74.637	474	16.28	1476	0.066
74.703	475	16.2	1475	0.118
74.821	476	16.12	1474	0.064
74.885	477	16.04	1473	0.102
74.987	478	15.96	1472	0.092
75.079	479	15.88	1471	0.066
75.145	480	15.8	1470	0.066
75.211	481	15.72	1469	0.053
75.264	482	15.64	1468	0.11
75.374	483	15.56	1467	0.177
75.551	484	15.48	1466	0.066
75.617	485	15.4	1465	0.138
75.755	486	15.32	1464	0.079
75.834	487	15.24	1463	0.195
76.029	488	15.16	1462	0.11
76.139	489	15.08	1461	0.113
76.252	490	15	1460	0.107
76.359	491	14.92	1459	0.181
76.54	492	14.84	1458	0.111
76.651	493	14.76	1457	0.105
76.756	494	14.68	1456	0.078
76.834	495	14.6	1455	0.132
76.966	496	14.52	1454	0.044
77.01	497	14.44	1453	0.097
77.107	498	14.36	1452	0.096
77.203	499	14.28	1451	0.17
77.373	500	14.2	1450	0.103
77.476	501	14.12	1449	0.088
77.564	502	14.04	1448	0.099
77.663	503	13.96	1447	0.133
77.796	504	13.88	1446	0.131
77.927	505	13.8	1445	0.077
78.004	506	13.72	1444	0.08
78.084	507	13.64	1443	0.063
78.147	508	13.56	1442	0.128
78.275	509	13.48	1441	0.185
78.46	510	13.4	1440	0.148
78.608	511	13.32	1439	0.093
78.701	512	13.24	1438	0.129
78.83	513	13.16	1437	0.101
78.931	514	13.08	1436	0.114
79.045	515	13	1435	0.188
79.233	516	12.92	1434	0.081
79.314	517	12.84	1433	0.118
79.432	518	12.76	1432	0.122
79.554	519	12.68	1431	0.086
79.64	520	12.6	1430	0.1
79.74	521	12.52	1429	0.094
79.834	522	12.44	1428	0.063
79.897	523	12.36	1427	0.081
79.978	524	12.28	1426	0.073
80.051	525	12.2	1425	0.113
80.164	526	12.12	1424	0.078
80.242	527	12.04	1423	0.158
80.4	528	11.96	1422	0.139
80.539	529	11.88	1421	0.067
80.606	530	11.8	1420	0.089
80.695	531	11.72	1419	0.09
80.785	532	11.64	1418	0.192
80.977	533	11.56	1417	0.05
81.027	534	11.48	1416	0.099
81.126	535	11.4	1415	0.091
81.217	536	11.32	1414	0.082
81.299	537	11.24	1413	0.082
81.381	538	11.16	1412	0.071
81.452	539	11.08	1411	0.138
81.59	540	11	1410	0.075
81.665	541	10.92	1409	0.073
81.738	542	10.84	1408	0.111
81.849	543	10.76	1407	0.141
81.99	544	10.68	1406	0.049
82.039	545	10.6	1405	0.043
82.082	546	10.52	1404	0.121
82.203	547	10.44	1403	0.068
82.271	548	10.36	1402	0.073
82.344	549	10.28	1401	0.074
82.418	550	10.2	1400	0.14
82.558	551	10.12	1399	0.074
82.632	552	10.04	1398	0.091
82.723	553	9.96	1397	0.075
82.798	554	9.88	1396	0.113
82.911	555	9.8	1395	0.079
82.99	556	9.72	1394	0.047
83.037	557	9.64	1393	0.162
83.199	558	9.56	1392	0.133
83.332	559	9.48	1391	0.1
83.432	560	9.4	1390	0.097
83.529	561	9.32	1389	0.125
83.654	562	9.24	1388	0.152
83.806	563	9.16	1387	0.138
83.944	564	9.08	1386	0.07
84.014	565	9	1385	0.113
84.127	566	8.92	1384	0.095
84.222	567	8.84	1383	0.137
84.359	568	8.76	1382	0.126
84.485	569	8.68	1381	0.083
84.568	570	8.6	1380	0.149
84.717	571	8.52	1379	0.077
84.794	572	8.44	1378	0.066
84.86	573	8.36	1377	0.079
84.939	574	8.28	1376	0.108
85.047	575	8.2	1375	0.123
85.17	576	8.12	1374	0.11
85.28	577	8.04	1373	0.077
85.357	578	7.96	1372	0.087
85.444	579	7.88	1371	0.095
85.539	580	7.8	1370	0.055
85.594	581	7.72	1369	0.15
85.744	582	7.64	1368	0.168
85.912	583	7.56	1367	0.197
86.109	584	7.48	1366	0.106
86.215	585	7.4	1365	0.079
86.294	586	7.32	1364	0.102
86.396	587	7.24	1363	0.083
86.479	588	7.16	1362	0.064
86.543	589	7.08	1361	0.074
86.617	590	7	1360	0.051
86.668	591	6.92	1359	0.072
86.74	592	6.84	1358	0.085
86.825	593	6.76	1357	0.149
86.974	594	6.68	1356	0.083
87.057	595	6.6	1355	0.072
87.129	596	6.52	1354	0.064
87.193	597	6.44	1353	0.054
87.247	598	6.36	1352	0.101
87.348	599	6.28	1351	0.054
87.402	600	6.2	1350	0.128
87.53	601	6.12	1349	0.122
87.652	602	6.04	1348	0.072
87.724	603	5.96	1347	0.104
87.828	604	5.88	1346	0.139
87.967	605	5.8	1345	0.062
88.029	606	5.72	1344	0.063
88.092	607	5.64	1343	0.129
88.221	608	5.56	1342	0.073
88.294	609	5.48	1341	0.056
88.35	610	5.4	1340	0.121
88.471	611	5.32	1339	0.113
88.584	612	5.24	1338	0.107
88.691	613	5.16	1337	0.116
88.807	614	5.08	1336	0.168
88.975	615	5	1335	0.035
89.01	616	4.92	1334	0.114
89.124	617	4.84	1333	0.152
89.276	618	4.76	1332	0.111
89.387	619	4.68	1331	0.076
89.463	620	4.6	1330	0.063
89.526	621	4.52	1329	0.077
89.603	622	4.44	1328	0.09
89.693	623	4.36	1327	0.097
89.79	624	4.28	1326	0.064
89.854	625	4.2	1325	0.09
89.944	626	4.12	1324	0.1
90.044	627	4.04	1323	0.14
90.184	628	3.96	1322	0.06
90.244	629	3.88	1321	0.114
90.358	630	3.8	1320	0.146
90.504	631	3.72	1319	0.086
90.59	632	3.64	1318	0.113
90.703	633	3.56	1317	0.1
90.803	634	3.48	1316	0.068
90.871	635	3.4	1315	0.106
90.977	636	3.32	1314	0.114
91.091	637	3.24	1313	0.053
91.144	638	3.16	1312	0.051
91.195	639	3.08	1311	0.071
91.266	640	3	1310	0.107
91.373	641	2.92	1309	0.128
91.501	642	2.84	1308	0.076
91.577	643	2.76	1307	0.04
91.617	644	2.68	1306	0.101
91.718	645	2.6	1305	0.053
91.771	646	2.52	1304	0.039
91.81	647	2.44	1303	0.073
91.883	648	2.36	1302	0.06
91.943	649	2.28	1301	0.039
91.982	650	2.2	1300	0.031
92.013	651	2.12	1299	0.105
92.118	652	2.04	1298	0.159
92.277	653	1.96	1297	0.118
92.395	654	1.88	1296	0.116
92.511	655	1.8	1295	0.071
92.582	656	1.72	1294	0.084
92.666	657	1.64	1293	0.094
92.76	658	1.56	1292	0.101
92.861	659	1.48	1291	0.068
92.929	660	1.4	1290	0.046
92.975	661	1.32	1289	0.053
93.028	662	1.24	1288	0.089
93.117	663	1.16	1287	0.128
93.245	664	1.08	1286	0.11
93.355	665	1	1285	0.081
93.436	666	1.08	1284	0.131
93.567	667	1.16	1283	0.1
93.667	668	1.24	1282	0.067
93.734	669	1.32	1281	0.09
93.824	670	1.4	1280	0.057
93.881	671	1.48	1279	0.073
93.954	672	1.56	1278	0.059
94.013	673	1.64	1277	0.075
94.088	674	1.72	1276	0.085
94.173	675	1.8	1275	0.068
94.241	676	1.88	1274	0.087
94.328	677	1.96	1273	0.077
94.405	678	2.04	1272	0.048
94.453	679	2.12	1271	0.057
94.51	680	2.04	1270	0.101
94.611	681	1.96	1269	0.081
94.692	682	1.88	1268	0.078
94.77	683	1.8	1267	0.07
94.84	684	1.72	1266	0.136
94.976	685	1.64	1265	0.042
95.018	686	1.56	1264	0.07
95.088	687	1.48	1263	0.07
95.158	688	1.4	1262	0.038
95.196	689	1.32	1261	0.056
95.252	690	1.24	1260	0.041
95.293	691	1.16	1259	0.055
95.348	692	1.08	1258	0.156
95.504	693	1	1257	0.083
95.587	694	1.05	1256	0.105
95.692	695	1.1	1255	0.06
95.752	696	1.15	1254	0.033
95.785	697	1.2	1253	0.039
95.824	698	1.25	1252	0.118
95.942	699	1.3	1251	0.123
96.065	700	1.35	1250	0.095
96.16	701	1.4	1249	0.105
96.265	702	1.45	1248	0.082
96.347	703	1.5	1247	0.047
96.394	704	1.55	1246	0.095
96.489	705	1.6	1245	0.119
96.608	706	1.65	1244	0.096
96.704	707	1.7	1243	0.087
96.791	708	1.65	1242	0.105
96.896	709	1.6	1241	0.066
96.962	710	1.55	1240	0.048
97.01	711	1.5	1239	0.067
97.077	712	1.45	1238	0.061
97.138	713	1.4	1237	0.073
97.211	714	1.35	1236	0.066
97.277	715	1.3	1235	0.041
97.318	716	1.25	1234	0.047
97.365	717	1.2	1233	0.067
97.432	718	1.15	1232	0.035
97.467	719	1.1	1231	0.07
97.537	720	1.05	1230	0.075
97.612	721	1	1229	0.055
97.667	722	1.1	1228	0.083
97.75	723	1.2	1227	0.094
97.844	724	1.3	1226	0.082
97.926	725	1.4	1225	0.07
97.996	726	1.5	1224	0.059
98.055	727	1.6	1223	0.113
98.168	728	1.7	1222	0.13
98.298	729	1.8	1221	0.173
98.471	730	1.9	1220	0.105
98.576	731	2	1219	0.149
98.725	732	2.1	1218	0.142
98.867	733	2.2	1217	0.063
98.93	734	2.3	1216	0.131
99.061	735	2.4	1215	0.054
99.115	736	2.5	1214	0.09
99.205	737	2.6	1213	0.088
99.293	738	2.7	1212	0.121
99.414	739	2.8	1211	0.094
99.508	740	2.9	1210	0.138
99.646	741	3	1209	0.088
99.734	742	3.1	1208	0.067
99.801	743	3.2	1207	0.074
99.875	744	3.3	1206	0.087
99.962	745	3.4	1205	0.079
100.041	746	3.5	1204	0.119
100.16	747	3.6	1203	0.104
100.264	748	3.7	1202	0.071
100.335	749	3.8	1201	0.101
100.436	750	3.9	1200	0.045
100.481	751	4	1199	0.063
100.544	752	4.1	1198	0.128
100.672	753	4.2	1197	0.058
100.73	754	4.3	1196	0.066
100.796	755	4.4	1195	0.071
100.867	756	4.5	1194	0.191
101.058	757	4.6	1193	0.044
101.102	758	4.7	1192	0.074
101.176	759	4.8	1191	0.043
101.219	760	4.9	1190	0.138
101.357	761	5	1189	0.098
101.455	762	5.1	1188	0.102
101.557	763	5.2	1187	0.125
101.682	764	5.3	1186	0.096
101.778	765	5.4	1185	0.091
101.869	766	5.5	1184	0.104
101.973	767	5.6	1183	0.058
102.031	768	5.7	1182	0.083
102.114	769	5.8	1181	0.085
102.199	770	5.9	1180	0.101
102.3	771	6	1179	0.114
102.414	772	6.1	1178	0.047
102.461	773	6.2	1177	0.068
102.529	774	6.3	1176	0.092
102.621	775	6.4	1175	0.059
102.68	776	6.5	1174	0.05
102.73	777	6.6	1173	0.048
102.778	778	6.7	1172	0.122
102.9	779	6.8	1171	0.151
103.051	780	6.9	1170	0.096
103.147	781	7	1169	0.127
103.274	782	7.1	1168	0.121
103.395	783	7.2	1167	0.091
103.486	784	7.3	1166	0.096
103.582	785	7.4	1165	0.09
103.672	786	7.5	1164	0.11
103.782	787	7.6	1163	0.077
103.859	788	7.7	1162	0.1
103.959	789	7.8	1161	0.121
104.08	790	7.9	1160	0.08
104.16	791	8	1159	0.108
104.268	792	8.1	1158	0.063
104.331	793	8.2	1157	0.137
104.468	794	8.3	1156	0.112
104.58	795	8.4	1155	0.095
104.675	796	8.5	1154	0.099
104.774	797	8.6	1153	0.057
104.831	798	8.7	1152	0.103
104.934	799	8.8	1151	0.123
105.057	800	8.9	1150	0.079
105.136	801	9	1149	0.114
105.25	802	9.1	1148	0.098
105.348	803	9.2	1147	0.115
105.463	804	9.3	1146	0.137
105.6	805	9.4	1145	0.089
105.689	806	9.5	1144	0.091
105.78	807	9.6	1143	0.064
105.844	808	9.7	1142	0.111
105.955	809	9.8	1141	0.111
106.066	810	9.9	1140	0.114
106.18	811	10	1139	0.095
106.275	812	10.1	1138	0.1
106.375	813	10.2	1137	0.057
106.432	814	10.3	1136	0.159
106.591	815	10.4	1135	0.075
106.666	816	10.5	1134	0.15
106.816	817	10.6	1133	0.063
106.879	818	10.7	1132	0.049
106.928	819	10.8	1131	0.052
106.98	820	10.9	1130	0.115
107.095	821	11	1129	0.1
107.195	822	11.1	1128	0.1
107.295	823	11.2	1127	0.077
107.372	824	11.3	1126	0.099
107.471	825	11.4	1125	0.071
107.542	826	11.5	1124	0.062
107.604	827	11.6	1123	0.082
107.686	828	11.7	1122	0.051
107.737	829	11.8	1121	0.085
107.822	830	11.9	1120	0.073
107.895	831	12	1119	0.072
107.967	832	12.1	1118	0.025
107.992	833	12.2	1117	0.09
108.082	834	12.3	1116	0.053
108.135	835	12.4	1115	0.057
108.192	836	12.5	1114	0.083
108.275	837	12.6	1113	0.161
108.436	838	12.7	1112	0.092
108.528	839	12.8	1111	0.155
108.683	840	12.9	1110	0.04
108.723	841	13	1109	0.075
108.798	842	13.1	1108	0.093
108.891	843	13.2	1107	0.075
108.966	844	13.3	1106	0.064
109.03	845	13.4	1105	0.097
109.127	846	13.5	1104	0.043
109.17	847	13.6	1103	0.065
109.235	848	13.7	1102	0.065
109.3	849	13.8	1101	0.065
109.365	850	13.9	1100	0.069
109.434	851	14	1099	0.076
109.51	852	14.1	1098	0.091
109.601	853	14.2	1097	0.083
109.684	854	14.3	1096	0.117
109.801	855	14.4	1095	0.051
109.852	856	14.5	1094	0.058
109.91	857	14.6	1093	0.154
110.064	858	14.7	1092	0.101
110.165	859	14.8	1091	0.053
110.218	860	14.9	1090	0.098
110.316	861	15	1089	0.073
110.389	862	15.1	1088	0.043
110.432	863	15.2	1087	0.086
110.518	864	15.3	1086	0.076
110.594	865	15.4	1085	0.099
110.693	866	15.5	1084	0.044
110.737	867	15.6	1083	0.107
110.844	868	15.7	1082	0.066
110.91	869	15.8	1081	0.145
111.055	870	15.9	1080	0.066
111.121	871	16	1079	0.052
111.173	872	16.1	1078	0.054
111.227	873	16.2	1077	0.086
111.313	874	16.3	1076	0.068
111.381	875	16.4	1075	0.1
111.481	876	16.5	1074	0.047
111.528	877	16.6	1073	0.121
111.649	878	16.7	1072	0.115
111.764	879	16.8	1071	0.052
111.816	880	16.9	1070	0.049
111.865	881	17	1069	0.053
111.918	882	17.1	1068	0.065
111.983	883	17.2	1067	0.078
112.061	884	17.3	1066	0.164
112.225	885	17.4	1065	0.124
112.349	886	17.5	1064	0.123
112.472	887	17.6	1063	0.097
112.569	888	17.7	1062	0.062
112.631	889	17.8	1061	0.059
112.69	890	17.9	1060	0.044
112.734	891	18	1059	0.069
112.803	892	18.1	1058	0.113
112.916	893	18.2	1057	0.051
112.967	894	18.3	1056	0.039
113.006	895	18.4	1055	0.05
113.056	896	18.5	1054	0.07
113.126	897	18.6	1053	0.046
113.172	898	18.7	1052	0.079
113.251	899	18.8	1051	0.074
113.325	900	18.9	1050	0.101
113.426	901	19	1049	0.1
113.526	902	19.1	1048	0.086
113.612	903	19.2	1047	0.108
113.72	904	19.3	1046	0.069
113.789	905	19.4	1045	0.041
113.83	906	19.5	1044	0.066
113.896	907	19.6	1043	0.094
113.99	908	19.7	1042	0.014
114.004	909	19.8	1041	0.033
114.037	910	19.9	1040	0.042
114.079	911	20	1039	0.077
114.156	912	20.1	1038	0.104
114.26	913	20.2	1037	0.124
114.384	914	20.3	1036	0.087
114.471	915	20.4	1035	0.094
114.565	916	20.5	1034	0.08
114.645	917	20.6	1033	0.058
114.703	918	20.7	1032	0.09
114.793	919	20.8	1031	0.109
114.902	920	20.9	1030	0.035
114.937	921	21	1029	0.112
115.049	922	21.1	1028	0.094
115.143	923	21.2	1027	0.058
115.201	924	21.3	1026	0.054
115.255	925	21.4	1025	0.123
115.378	926	21.5	1024	0.178
115.556	927	21.6	1023	0.171
115.727	928	21.7	1022	0.208
115.935	929	21.8	1021	0.089
116.024	930	21.9	1020	0.054
116.078	931	22	1019	0.048
116.126	932	22.1	1018	0.092
116.218	933	22.2	1017	0.046
116.264	934	22.3	1016	0.068
116.332	935	22.4	1015	0.046
116.378	936	22.5	1014	0.099
116.477	937	22.6	1013	0.113
116.59	938	22.7	1012	0.166
116.756	939	22.8	1011	0.107
116.863	940	22.9	1010	0.066
116.929	941	23	1009	0.157
117.086	942	23.1	1008	0.057
117.143	943	23.2	1007	0.095
117.238	944	23.3	1006	0.035
117.273	945	23.4	1005	0.061
117.334	946	23.5	1004	0.125
117.459	947	23.6	1003	0.086
117.545	948	23.7	1002	0.058
117.603	949	23.8	1001	0.109
117.712	950	23.9	1000	0.122
117.834	951	24	999	0.042
117.876	952	24.1	998	0.042
117.918	953	24.2	997	0.033
117.951	954	24.3	996	0.195
118.146	955	24.4	995	0.152
118.298	956	24.5	994	0.083
118.381	957	24.6	993	0.148
118.529	958	24.7	992	0.065
118.594	959	24.8	991	0.096
118.69	960	24.9	990	0.06
118.75	961	25	989	0.053
118.803	962	25.1	988	0.056
118.859	963	25.2	987	0.055
118.914	964	25.3	986	0.106
119.02	965	25.4	985	0.07
119.09	966	25.5	984	0.108
119.198	967	25.6	983	0.115
119.313	968	25.7	982	0.054
119.367	969	25.8	981	0.076
119.443	970	25.9	980	0.047
119.49	971	26	979	0.04
119.53	972	26.1	978	0.099
119.629	973	26.2	977	0.076
119.705	974	26.3	976	0.069
119.774	975	26.4	975	0.084
119.858	976	26.5	974	0.066
119.924	977	26.6	973	0.056
119.98	978	26.7	972	0.114
120.094	979	26.8	971	0.065
120.159	980	26.9	970	0.137
120.296	981	27	969	0.116
120.412	982	27.1	968	0.068
120.48	983	27.2	967	0.029
120.509	984	27.3	966	0.094
120.603	985	27.4	965	0.061
120.664	986	27.5	964	0.068
120.732	987	27.6	963	0.066
120.798	988	27.7	962	0.044
120.842	989	27.8	961	0.041
120.883	990	27.9	960	0.049
120.932	991	28	959	0.027
120.959	992	28.1	958	0.107
121.066	993	28.2	957	0.073
121.139	994	28.3	956	0.068
121.207	995	28.4	955	0.076
121.283	996	28.5	954	0.08
121.363	997	28.6	953	0.045
121.408	998	28.7	952	0.067
121.475	999	28.8	951	0.068
121.543	1000	28.9	950	0.045
121.588	1001	29	949	0.045
121.633	1002	29.1	948	0.066
121.699	1003	29.2	947	0.058
121.757	1004	29.3	946	0.126
121.883	1005	29.4	945	0.08
121.963	1006	29.5	944	0.097
122.06	1007	29.6	943	0.176
122.236	1008	29.7	942	0.08
122.316	1009	29.8	941	0.054
122.37	1010	29.9	940	0.058
122.428	1011	30	939	0.048
122.476	1012	30.1	938	0.052
122.528	1013	30.2	937	0.076
122.604	1014	30.3	936	0.062
122.666	1015	30.4	935	0.05
122.716	1016	30.5	934	0.095
122.811	1017	30.6	933	0.13
122.941	1018	30.7	932	0.037
122.978	1019	30.8	931	0.058
123.036	1020	30.9	930	0.069
123.105	1021	31	929	0.098
123.203	1022	31.1	928	0.076
123.279	1023	31.2	927	0.089
123.368	1024	31.3	926	0.043
123.411	1025	31.4	925	0.058
123.469	1026	31.5	924	0.097
123.566	1027	31.6	923	0.118
123.684	1028	31.7	922	0.048
123.732	1029	31.8	921	0.101
123.833	1030	31.9	920	0.073
123.906	1031	32	919	0.073
123.979	1032	32.1	918	0.181
124.16	1033	32.2	917	0.088
124.248	1034	32.3	916	0.091
124.339	1035	32.4	915	0.035
124.374	1036	32.5	914	0.05
124.424	1037	32.6	913	0.053
124.477	1038	32.7	912	0.121
124.598	1039	32.8	911	0.051
124.649	1040	32.9	910	0.055
124.704	1041	33	909	0.048
124.752	1042	33.1	908	0.041
124.793	1043	33.2	907	0.047
124.84	1044	33.3	906	0.04
124.88	1045	33.4	905	0.046
124.926	1046	33.5	904	0.06
124.986	1047	33.6	903	0.069
125.055	1048	33.7	902	0.081
125.136	1049	33.8	901	0.037
125.173	1050	33.9	900	0.055
125.228	1051	34	899	0.111
125.339	1052	34.1	898	0.106
125.445	1053	34.2	897	0.093
125.538	1054	34.3	896	0.089
125.627	1055	34.4	895	0.039
125.666	1056	34.5	894	0.061
125.727	1057	34.6	893	0.052
125.779	1058	34.7	892	0.038
125.817	1059	34.8	891	0.119
125.936	1060	34.9	890	0.059
125.995	1061	35	889	0.061
126.056	1062	35.1	888	0.104
126.16	1063	35.2	887	0.062
126.222	1064	35.3	886	0.036
126.258	1065	35.4	885	0.026
126.284	1066	35.5	884	0.032
126.316	1067	35.6	883	0.03
126.346	1068	35.7	882	0.036
126.382	1069	35.8	881	0.079
126.461	1070	35.9	880	0.031
126.492	1071	36	879	0.041
126.533	1072	36.1	878	0.058
126.591	1073	36.2	877	0.064
126.655	1074	36.3	876	0.048
126.703	1075	36.4	875	0.029
126.732	1076	36.5	874	0.1
126.832	1077	36.6	873	0.037
126.869	1078	36.7	872	0.035
126.904	1079	36.8	871	0.057
126.961	1080	36.9	870	0.09
127.051	1081	37	869	0.131
127.182	1082	37.1	868	0.07
127.252	1083	37.2	867	0.045
127.297	1084	37.3	866	0.076
127.373	1085	37.4	865	0.068
127.441	1086	37.5	864	0.065
127.506	1087	37.6	863	0.079
127.585	1088	37.7	862	0.037
127.622	1089	37.8	861	0.085
127.707	1090	37.9	860	0.086
127.793	1091	38	859	0.038
127.831	1092	38.1	858	0.037
127.868	1093	38.2	857	0.029
127.897	1094	38.3	856	0.05
127.947	1095	38.4	855	0.128
128.075	1096	38.5	854	0.036
128.111	1097	38.6	853	0.049
128.16	1098	38.7	852	0.044
128.204	1099	38.8	851	0.058
128.262	1100	38.9	850	0.098
128.36	1101	39	849	0.054
128.414	1102	39.1	848	0.062
128.476	1103	39.2	847	0.031
128.507	1104	39.3	846	0.028
128.535	1105	39.4	845	0.041
128.576	1106	39.5	844	0.061
128.637	1107	39.6	843	0.07
128.707	1108	39.7	842	0.081
128.788	1109	39.8	841	0.048
128.836	1110	39.9	840	0.031
128.867	1111	40	839	0.045
128.912	1112	40.1	838	0.055
128.967	1113	40.2	837	0.06
129.027	1114	40.3	836	0.063
129.09	1115	40.4	835	0.142
129.232	1116	40.5	834	0.043
129.275	1117	40.6	833	0.065
129.34	1118	40.7	832	0.029
129.369	1119	40.8	831	0.1
129.469	1120	40.9	830	0.094
129.563	1121	41	829	0.042
129.605	1122	41.1	828	0.064
129.669	1123	41.2	827	0.097
129.766	1124	41.3	826	0.078
129.844	1125	41.4	825	0.097
129.941	1126	41.5	824	0.117
130.058	1127	41.6	823	0.249
130.307	1128	41.7	822	0.053
130.36	1129	41.8	821	0.057
130.417	1130	41.9	820	0.038
130.455	1131	42	819	0.097
130.552	1132	42.1	818	0.046
130.598	1133	42.2	817	0.034
130.632	1134	42.3	816	0.042
130.674	1135	42.4	815	0.126
130.8	1136	42.5	814	0.067
130.867	1137	42.6	813	0.037
130.904	1138	42.7	812	0.077
130.981	1139	42.8	811	0.061
131.042	1140	42.9	810	0.11
131.152	1141	43	809	0.09
131.242	1142	43.1	808	0.094
131.336	1143	43.2	807	0.085
131.421	1144	43.3	806	0.104
131.525	1145	43.4	805	0.071
131.596	1146	43.5	804	0.099
131.695	1147	43.6	803	0.055
131.75	1148	43.7	802	0.09
131.84	1149	43.8	801	0.074
131.914	1150	43.9	800	0.066
131.98	1151	44	799	0.026
132.006	1152	44.1	798	0.106
132.112	1153	44.2	797	0.164
132.276	1154	44.3	796	0.111
132.387	1155	44.4	795	0.086
132.473	1156	44.5	794	0.042
132.515	1157	44.6	793	0.026
132.541	1158	44.7	792	0.027
132.568	1159	44.8	791	0.044
132.612	1160	44.9	790	0.176
132.788	1161	45	789	0.058
132.846	1162	45.1	788	0.04
132.886	1163	45.2	787	0.069
132.955	1164	45.3	786	0.039
132.994	1165	45.4	785	0.073
133.067	1166	45.5	784	0.068
133.135	1167	45.6	783	0.039
133.174	1168	45.7	782	0.078
133.252	1169	45.8	781	0.059
133.311	1170	45.9	780	0.033
133.344	1171	46	779	0.078
133.422	1172	46.1	778	0.064
133.486	1173	46.2	777	0.043
133.529	1174	46.3	776	0.071
133.6	1175	46.4	775	0.058
133.658	1176	46.5	774	0.078
133.736	1177	46.6	773	0.067
133.803	1178	46.7	772	0.116
133.919	1179	46.8	771	0.065
133.984	1180	46.9	770	0.029
134.013	1181	47	769	0.056
134.069	1182	47.1	768	0.082
134.151	1183	47.2	767	0.058
134.209	1184	47.3	766	0.066
134.275	1185	47.4	765	0.122
134.397	1186	47.5	764	0.043
134.44	1187	47.6	763	0.113
134.553	1188	47.7	762	0.108
134.661	1189	47.8	761	0.044
134.705	1190	47.9	760	0.051
134.756	1191	48	759	0.128
134.884	1192	48.1	758	0.03
134.914	1193	48.2	757	0.023
134.937	1194	48.3	756	0.095
135.032	1195	48.4	755	0.091
135.123	1196	48.5	754	0.086
135.209	1197	48.6	753	0.045
135.254	1198	48.7	752	0.101
135.355	1199	48.8	751	0.039
135.394	1200	48.9	750	0.038
135.432	1201	49	749	0.037
135.469	1202	49.1	748	0.031
135.5	1203	49.2	747	0.066
135.566	1204	49.3	746	0.046
135.612	1205	49.4	745	0.093
135.705	1206	49.5	744	0.023
135.728	1207	49.6	743	0.024
135.752	1208	49.7	742	0.078
135.83	1209	49.8	741	0.051
135.881	1210	49.9	740	0.038
135.919	1211	50	739	0.077
135.996	1212	50.1	738	0.028
136.024	1213	50.2	737	0.14
136.164	1214	50.3	736	0.081
136.245	1215	50.4	735	0.072
136.317	1216	50.5	734	0.048
136.365	1217	50.6	733	0.083
136.448	1218	50.7	732	0.075
136.523	1219	50.8	731	0.082
136.605	1220	50.9	730	0.155
136.76	1221	51	729	0.042
136.802	1222	51.1	728	0.158
136.96	1223	51.2	727	0.079
137.039	1224	51.3	726	0.061
137.1	1225	51.4	725	0.103
137.203	1226	51.5	724	0.037
137.24	1227	51.6	723	0.089
137.329	1228	51.7	722	0.036
137.365	1229	51.8	721	0.033
137.398	1230	51.9	720	0.061
137.459	1231	52	719	0.093
137.552	1232	52.1	718	0.053
137.605	1233	52.2	717	0.086
137.691	1234	52.3	716	0.057
137.748	1235	52.4	715	0.078
137.826	1236	52.5	714	0.049
137.875	1237	52.6	713	0.088
137.963	1238	52.7	712	0.111
138.074	1239	52.8	711	0.062
138.136	1240	52.9	710	0.063
138.199	1241	53	709	0.06
138.259	1242	53.1	708	0.041
138.3	1243	53.2	707	0.035
138.335	1244	53.3	706	0.055
138.39	1245	53.4	705	0.037
138.427	1246	53.5	704	0.071
138.498	1247	53.6	703	0.065
138.563	1248	53.7	702	0.078
138.641	1249	53.8	701	0.12
138.761	1250	53.9	700	0.046
138.807	1251	54	699	0.088
138.895	1252	54.1	698	0.099
138.994	1253	54.2	697	0.065
139.059	1254	54.3	696	0.061
139.12	1255	54.4	695	0.079
139.199	1256	54.5	694	0.043
139.242	1257	54.6	693	0.075
139.317	1258	54.7	692	0.087
139.404	1259	54.8	691	0.11
139.514	1260	54.9	690	0.107
139.621	1261	55	689	0.063
139.684	1262	55.1	688	0.091
139.775	1263	55.2	687	0.142
139.917	1264	55.3	686	0.071
139.988	1265	55.4	685	0.038
140.026	1266	55.5	684	0.079
140.105	1267	55.6	683	0.032
140.137	1268	55.7	682	0.127
140.264	1269	55.8	681	0.084
140.348	1270	55.9	680	0.047
140.395	1271	56	679	0.136
140.531	1272	56.1	678	0.042
140.573	1273	56.2	677	0.056
140.629	1274	56.3	676	0.075
140.704	1275	56.4	675	0.085
140.789	1276	56.5	674	0.097
140.886	1277	56.6	673	0.04
140.926	1278	56.7	672	0.062
140.988	1279	56.8	671	0.061
141.049	1280	56.9	670	0.078
141.127	1281	57	669	0.043
141.17	1282	57.1	668	0.047
141.217	1283	57.2	667	0.072
141.289	1284	57.3	666	0.106
141.395	1285	57.4	665	0.048
141.443	1286	57.5	664	0.062
141.505	1287	57.6	663	0.097
141.602	1288	57.7	662	0.068
141.67	1289	57.8	661	0.051
141.721	1290	57.9	660	0.034
141.755	1291	58	659	0.051
141.806	1292	58.1	658	0.184
141.99	1293	58.2	657	0.065
142.055	1294	58.3	656	0.09
142.145	1295	58.4	655	0.032
142.177	1296	58.5	654	0.09
142.267	1297	58.6	653	0.133
142.4	1298	58.7	652	0.051
142.451	1299	58.8	651	0.067
142.518	1300	58.9	650	0.074
142.592	1301	59	649	0.067
142.659	1302	59.1	648	0.062
142.721	1303	59.2	647	0.064
142.785	1304	59.3	646	0.074
142.859	1305	59.4	645	0.086
142.945	1306	59.5	644	0.084
143.029	1307	59.6	643	0.039
143.068	1308	59.7	642	0.081
143.149	1309	59.8	641	0.048
143.197	1310	59.9	640	0.145
143.342	1311	60	639	0.097
143.439	1312	60.1	638	0.038
143.477	1313	60.2	637	0.119
143.596	1314	60.3	636	0.061
143.657	1315	60.4	635	0.097
143.754	1316	60.5	634	0.091
143.845	1317	60.6	633	0.048
143.893	1318	60.7	632	0.052
143.945	1319	60.8	631	0.043
143.988	1320	60.9	630	0.102
144.09	1321	61	629	0.097
144.187	1322	61.1	628	0.094
144.281	1323	61.2	627	0.071
144.352	1324	61.3	626	0.096
144.448	1325	61.4	625	0.075
144.523	1326	61.5	624	0.056
144.579	1327	61.6	623	0.072
144.651	1328	61.7	622	0.085
144.736	1329	61.8	621	0.078
144.814	1330	61.9	620	0.104
144.918	1331	62	619	0.08
144.998	1332	62.1	618	0.044
145.042	1333	62.2	617	0.127
145.169	1334	62.3	616	0.092
145.261	1335	62.4	615	0.094
145.355	1336	62.5	614	0.069
145.424	1337	62.6	613	0.049
145.473	1338	62.7	612	0.046
145.519	1339	62.8	611	0.051
145.57	1340	62.9	610	0.02
145.59	1341	63	609	0.063
145.653	1342	63.1	608	0.05
145.703	1343	63.2	607	0.051
145.754	1344	63.3	606	0.066
145.82	1345	63.4	605	0.056
145.876	1346	63.5	604	0.071
145.947	1347	63.6	603	0.053
146	1348	63.7	602	0.043
146.043	1349	63.8	601	0.031
146.074	1350	63.9	600	0.049
146.123	1351	64	599	0.052
146.175	1352	64.1	598	0.078
146.253	1353	64.2	597	0.072
146.325	1354	64.3	596	0.065
146.39	1355	64.4	595	0.085
146.475	1356	64.5	594	0.084
146.559	1357	64.6	593	0.07
146.629	1358	64.7	592	0.057
146.686	1359	64.8	591	0.048
146.734	1360	64.9	590	0.033
146.767	1361	65	589	0.096
146.863	1362	65.1	588	0.058
146.921	1363	65.2	587	0.029
146.95	1364	65.3	586	0.083
147.033	1365	65.4	585	0.047
147.08	1366	65.5	584	0.068
147.148	1367	65.6	583	0.059
147.207	1368	65.7	582	0.074
147.281	1369	65.8	581	0.053
147.334	1370	65.9	580	0.051
147.385	1371	66	579	0.049
147.434	1372	66.1	578	0.074
147.508	1373	66.2	577	0.033
147.541	1374	66.3	576	0.078
147.619	1375	66.4	575	0.141
147.76	1376	66.5	574	0.164
147.924	1377	66.6	573	0.045
147.969	1378	66.7	572	0.082
148.051	1379	66.8	571	0.046
148.097	1380	66.9	570	0.086
148.183	1381	67	569	0.058
148.241	1382	67.1	568	0.062
148.303	1383	67.2	567	0.08
148.383	1384	67.3	566	0.06
148.443	1385	67.4	565	0.076
148.519	1386	67.5	564	0.047
148.566	1387	67.6	563	0.058
148.624	1388	67.7	562	0.153
148.777	1389	67.8	561	0.069
148.846	1390	67.9	560	0.077
148.923	1391	68	559	0.138
149.061	1392	68.1	558	0.095
149.156	1393	68.2	557	0.108
149.264	1394	68.3	556	0.064
149.328	1395	68.4	555	0.049
149.377	1396	68.5	554	0.07
149.447	1397	68.6	553	0.034
149.481	1398	68.7	552	0.08
149.561	1399	68.8	551	0.032
149.593	1400	68.9	550	0.041
149.634	1401	69	549	0.059
149.693	1402	69.1	548	0.041
149.734	1403	69.2	547	0.045
149.779	1404	69.3	546	0.045
149.824	1405	69.4	545	0.053
149.877	1406	69.5	544	0.1
149.977	1407	69.6	543	0.06
150.037	1408	69.7	542	0.054
150.091	1409	69.8	541	0.022
150.113	1410	69.9	540	0.024
150.137	1411	70	539	0.045
150.182	1412	70.1	538	0.076
150.258	1413	70.2	537	0.078
150.336	1414	70.3	536	0.062
150.398	1415	70.4	535	0.049
150.447	1416	70.5	534	0.087
150.534	1417	70.6	533	0.053
150.587	1418	70.7	532	0.065
150.652	1419	70.8	531	0.09
150.742	1420	70.9	530	0.072
150.814	1421	71	529	0.042
150.856	1422	71.1	528	0.062
150.918	1423	71.2	527	0.067
150.985	1424	71.3	526	0.079
151.064	1425	71.4	525	0.108
151.172	1426	71.5	524	0.086
151.258	1427	71.6	523	0.071
151.329	1428	71.7	522	0.06
151.389	1429	71.8	521	0.045
151.434	1430	71.9	520	0.043
151.477	1431	72	519	0.146
151.623	1432	72.1	518	0.086
151.709	1433	72.2	517	0.063
151.772	1434	72.3	516	0.068
151.84	1435	72.4	515	0.092
151.932	1436	72.5	514	0.07
152.002	1437	72.6	513	0.073
152.075	1438	72.7	512	0.058
152.133	1439	72.8	511	0.033
152.166	1440	72.9	510	0.04
152.206	1441	73	509	0.048
152.254	1442	73.1	508	0.052
152.306	1443	73.2	507	0.106
152.412	1444	73.3	506	0.033
152.445	1445	73.4	505	0.078
152.523	1446	73.5	504	0.108
152.631	1447	73.6	503	0.056
152.687	1448	73.7	502	0.104
152.791	1449	73.8	501	0.081
152.872	1450	73.9	500	0.079
152.951	1451	74	499	0.061
153.012	1452	74.1	498	0.112
153.124	1453	74.2	497	0.089
153.213	1454	74.3	496	0.04
153.253	1455	74.4	495	0.106
153.359	1456	74.5	494	0.026
153.385	1457	74.6	493	0.094
153.479	1458	74.7	492	0.089
153.568	1459	74.8	491	0.051
153.619	1460	74.9	490	0.05
153.669	1461	75	489	0.051
153.72	1462	75.1	488	0.071
153.791	1463	75.2	487	0.086
153.877	1464	75.3	486	0.058
153.935	1465	75.4	485	0.06
153.995	1466	75.5	484	0.039
154.034	1467	75.6	483	0.119
154.153	1468	75.7	482	0.052
154.205	1469	75.8	481	0.037
154.242	1470	75.9	480	0.097
154.339	1471	76	479	0.059
154.398	1472	76.1	478	0.058
154.456	1473	76.2	477	0.041
154.497	1474	76.3	476	0.056
154.553	1475	76.4	475	0.058
154.611	1476	76.5	474	0.068
154.679	1477	76.6	473	0.052
154.731	1478	76.7	472	0.025
154.756	1479	76.8	471	0.045
154.801	1480	76.9	470	0.08
154.881	1481	77	469	0.111
154.992	1482	77.1	468	0.033
155.025	1483	77.2	467	0.087
155.112	1484	77.3	466	0.093
155.205	1485	77.4	465	0.112
155.317	1486	77.5	464	0.118
155.435	1487	77.6	463	0.056
155.491	1488	77.7	462	0.106
155.597	1489	77.8	461	0.026
155.623	1490	77.9	460	0.067
155.69	1491	78	459	0.049
155.739	1492	78.1	458	0.042
155.781	1493	78.2	457	0.08
155.861	1494	78.3	456	0.028
155.889	1495	78.4	455	0.07
155.959	1496	78.5	454	0.037
155.996	1497	78.6	453	0.02
156.016	1498	78.7	452	0.037
156.053	1499	78.8	451	0.05
156.103	1500	78.9	450	0.055
156.158	1501	79	449	0.085
156.243	1502	79.1	448	0.058
156.301	1503	79.2	447	0.049
156.35	1504	79.3	446	0.06
156.41	1505	79.4	445	0.059
156.469	1506	79.5	444	0.035
156.504	1507	79.6	443	0.074
156.578	1508	79.7	442	0.065
156.643	1509	79.8	441	0.052
156.695	1510	79.9	440	0.047
156.742	1511	80	439	0.027
156.769	1512	80.1	438	0.051
156.82	1513	80.2	437	0.041
156.861	1514	80.3	436	0.041
156.902	1515	80.4	435	0.071
156.973	1516	80.5	434	0.059
157.032	1517	80.6	433	0.052
157.084	1518	80.7	432	0.066
157.15	1519	80.8	431	0.082
157.232	1520	80.9	430	0.056
157.288	1521	81	429	0.081
157.369	1522	81.1	428	0.027
157.396	1523	81.2	427	0.082
157.478	1524	81.3	426	0.073
157.551	1525	81.4	425	0.058
157.609	1526	81.5	424	0.043
157.652	1527	81.6	423	0.051
157.703	1528	81.7	422	0.053
157.756	1529	81.8	421	0.056
157.812	1530	81.9	420	0.051
157.863	1531	82	419	0.07
157.933	1532	82.1	418	0.052
157.985	1533	82.2	417	0.068
158.053	1534	82.3	416	0.053
158.106	1535	82.4	415	0.06
158.166	1536	82.5	414	0.172
158.338	1537	82.6	413	0.043
158.381	1538	82.7	412	0.054
158.435	1539	82.8	411	0.09
158.525	1540	82.9	410	0.033
158.558	1541	83	409	0.079
158.637	1542	83.1	408	0.06
158.697	1543	83.2	407	0.053
158.75	1544	83.3	406	0.041
158.791	1545	83.4	405	0.067
158.858	1546	83.5	404	0.027
158.885	1547	83.6	403	0.096
158.981	1548	83.7	402	0.064
159.045	1549	83.8	401	0.057
159.102	1550	83.9	400	0.103
159.205	1551	84	399	0.049
159.254	1552	84.1	398	0.07
159.324	1553	84.2	397	0.033
159.357	1554	84.3	396	0.053
159.41	1555	84.4	395	0.048
159.458	1556	84.5	394	0.081
159.539	1557	84.6	393	0.07
159.609	1558	84.7	392	0.059
159.668	1559	84.8	391	0.094
159.762	1560	84.9	390	0.076
159.838	1561	85	389	0.034
159.872	1562	85.1	388	0.036
159.908	1563	85.2	387	0.045
159.953	1564	85.3	386	0.057
160.01	1565	85.4	385	0.074
160.084	1566	85.5	384	0.123
160.207	1567	85.6	383	0.059
160.266	1568	85.7	382	0.071
160.337	1569	85.8	381	0.045
160.382	1570	85.9	380	0.035
160.417	1571	86	379	0.025
160.442	1572	86.1	378	0.029
160.471	1573	86.2	377	0.032
160.503	1574	86.3	376	0.04
160.543	1575	86.4	375	0.119
160.662	1576	86.5	374	0.033
160.695	1577	86.6	373	0.069
160.764	1578	86.7	372	0.033
160.797	1579	86.8	371	0.084
160.881	1580	86.9	370	0.053
160.934	1581	87	369	0.052
160.986	1582	87.1	368	0.03
161.016	1583	87.2	367	0.06
161.076	1584	87.3	366	0.059
161.135	1585	87.4	365	0.039
161.174	1586	87.5	364	0.086
161.26	1587	87.6	363	0.181
161.441	1588	87.7	362	0.102
161.543	1589	87.8	361	0.054
161.597	1590	87.9	360	0.05
161.647	1591	88	359	0.061
161.708	1592	88.1	358	0.055
161.763	1593	88.2	357	0.128
161.891	1594	88.3	356	0.063
161.954	1595	88.4	355	0.053
162.007	1596	88.5	354	0.05
162.057	1597	88.6	353	0.044
162.101	1598	88.7	352	0.031
162.132	1599	88.8	351	0.031
162.163	1600	88.9	350	0.132
162.295	1601	89	349	0.045
162.34	1602	89.1	348	0.068
162.408	1603	89.2	347	0.064
162.472	1604	89.3	346	0.033
162.505	1605	89.4	345	0.044
162.549	1606	89.5	344	0.066
162.615	1607	89.6	343	0.135
162.75	1608	89.7	342	0.034
162.784	1609	89.8	341	0.075
162.859	1610	89.9	340	0.051
162.91	1611	90	339	0.043
162.953	1612	90.1	338	0.042
162.995	1613	90.2	337	0.063
163.058	1614	90.3	336	0.142
163.2	1615	90.4	335	0.066
163.266	1616	90.5	334	0.103
163.369	1617	90.6	333	0.067
163.436	1618	90.7	332	0.138
163.574	1619	90.8	331	0.066
163.64	1620	90.9	330	0.036
163.676	1621	91	329	0.042
163.718	1622	91.1	328	0.061
163.779	1623	91.2	327	0.047
163.826	1624	91.3	326	0.054
163.88	1625	91.4	325	0.082
163.962	1626	91.5	324	0.032
163.994	1627	91.6	323	0.033
164.027	1628	91.7	322	0.105
164.132	1629	91.8	321	0.038
164.17	1630	91.9	320	0.059
164.229	1631	92	319	0.107
164.336	1632	92.1	318	0.04
164.376	1633	92.2	317	0.058
164.434	1634	92.3	316	0.047
164.481	1635	92.4	315	0.056
164.537	1636	92.5	314	0.033
164.57	1637	92.6	313	0.049
164.619	1638	92.7	312	0.074
164.693	1639	92.8	311	0.051
164.744	1640	92.9	310	0.071
164.815	1641	93	309	0.038
164.853	1642	93.1	308	0.06
164.913	1643	93.2	307	0.078
164.991	1644	93.3	306	0.039
165.03	1645	93.4	305	0.034
165.064	1646	93.5	304	0.101
165.165	1647	93.6	303	0.047
165.212	1648	93.7	302	0.054
165.266	1649	93.8	301	0.084
165.35	1650	93.9	300	0.06
165.41	1651	94	299	0.058
165.468	1652	94.1	298	0.064
165.532	1653	94.2	297	0.064
165.596	1654	94.3	296	0.046
165.642	1655	94.4	295	0.097
165.739	1656	94.5	294	0.042
165.781	1657	94.6	293	0.076
165.857	1658	94.7	292	0.054
165.911	1659	94.8	291	0.105
166.016	1660	94.9	290	0.087
166.103	1661	95	289	0.104
166.207	1662	95.1	288	0.07
166.277	1663	95.2	287	0.045
166.322	1664	95.3	286	0.043
166.365	1665	95.4	285	0.097
166.462	1666	95.5	284	0.038
166.5	1667	95.6	283	0.025
166.525	1668	95.7	282	0.051
166.576	1669	95.8	281	0.093
166.669	1670	95.9	280	0.046
166.715	1671	96	279	0.047
166.762	1672	96.1	278	0.082
166.844	1673	96.2	277	0.062
166.906	1674	96.3	276	0.035
166.941	1675	96.4	275	0.055
166.996	1676	96.5	274	0.112
167.108	1677	96.6	273	0.084
167.192	1678	96.7	272	0.063
167.255	1679	96.8	271	0.054
167.309	1680	96.9	270	0.043
167.352	1681	97	269	0.055
167.407	1682	97.1	268	0.045
167.452	1683	97.2	267	0.077
167.529	1684	97.3	266	0.085
167.614	1685	97.4	265	0.062
167.676	1686	97.5	264	0.065
167.741	1687	97.6	263	0.032
167.773	1688	97.7	262	0.024
167.797	1689	97.8	261	0.031
167.828	1690	97.9	260	0.059
167.887	1691	98	259	0.053
167.94	1692	98.1	258	0.046
167.986	1693	98.2	257	0.073
168.059	1694	98.3	256	0.188
168.247	1695	98.4	255	0.067
168.314	1696	98.5	254	0.026
168.34	1697	98.6	253	0.055
168.395	1698	98.7	252	0.054
168.449	1699	98.8	251	0.055
168.504	1700	98.9	250	0.057
168.561	1701	99	249	0.093
168.654	1702	99.1	248	0.059
168.713	1703	99.2	247	0.033
168.746	1704	99.3	246	0.031
168.777	1705	99.4	245	0.053
168.83	1706	99.5	244	0.028
168.858	1707	99.6	243	0.025
168.883	1708	99.7	242	0.039
168.922	1709	99.8	241	0.065
168.987	1710	99.9	240	0.056
169.043	1711	100	239	0.143
169.186	1712	100.1	238	0.046
169.232	1713	100.2	237	0.069
169.301	1714	100.3	236	0.038
169.339	1715	100.4	235	0.044
169.383	1716	100.5	234	0.066
169.449	1717	100.6	233	0.06
169.509	1718	100.7	232	0.032
169.541	1719	100.8	231	0.051
169.592	1720	100.9	230	0.037
169.629	1721	101	229	0.074
169.703	1722	101.1	228	0.064
169.767	1723	101.2	227	0.069
169.836	1724	101.3	226	0.053
169.889	1725	101.4	225	0.069
169.958	1726	101.5	224	0.062
170.02	1727	101.6	223	0.054
170.074	1728	101.7	222	0.104
170.178	1729	101.8	221	0.066
170.244	1730	101.9	220	0.054
170.298	1731	102	219	0.064
170.362	1732	102.1	218	0.039
170.401	1733	102.2	217	0.04
170.441	1734	102.3	216	0.043
170.484	1735	102.4	215	0.042
170.526	1736	102.5	214	0.076
170.602	1737	102.6	213	0.115
170.717	1738	102.7	212	0.056
170.773	1739	102.8	211	0.096
170.869	1740	102.9	210	0.068
170.937	1741	103	209	0.024
170.961	1742	103.1	208	0.109
171.07	1743	103.2	207	0.051
171.121	1744	103.3	206	0.062
171.183	1745	103.4	205	0.032
171.215	1746	103.5	204	0.06
171.275	1747	103.6	203	0.084
171.359	1748	103.7	202	0.065
171.424	1749	103.8	201	0.093
171.517	1750	103.9	200	0.047
171.564	1751	104	199	0.055
171.619	1752	104.1	198	0.03
171.649	1753	104.2	197	0.051
171.7	1754	104.3	196	0.072
171.772	1755	104.4	195	0.044
171.816	1756	104.5	194	0.094
171.91	1757	104.6	193	0.081
171.991	1758	104.7	192	0.048
172.039	1759	104.8	191	0.078
172.117	1760	104.9	190	0.043
172.16	1761	105	189	0.056
172.216	1762	105.1	188	0.063
172.279	1763	105.2	187	0.068
172.347	1764	105.3	186	0.061
172.408	1765	105.4	185	0.088
172.496	1766	105.5	184	0.082
172.578	1767	105.6	183	0.039
172.617	1768	105.7	182	0.051
172.668	1769	105.8	181	0.034
172.702	1770	105.9	180	0.029
172.731	1771	106	179	0.027
172.758	1772	106.1	178	0.043
172.801	1773	106.2	177	0.062
172.863	1774	106.3	176	0.071
172.934	1775	106.4	175	0.035
172.969	1776	106.5	174	0.067
173.036	1777	106.6	173	0.047
173.083	1778	106.7	172	0.101
173.184	1779	106.8	171	0.03
173.214	1780	106.9	170	0.103
173.317	1781	107	169	0.044
173.361	1782	107.1	168	0.057
173.418	1783	107.2	167	0.044
173.462	1784	107.3	166	0.031
173.493	1785	107.4	165	0.05
173.543	1786	107.5	164	0.044
173.587	1787	107.6	163	0.063
173.65	1788	107.7	162	0.047
173.697	1789	107.8	161	0.063
173.76	1790	107.9	160	0.076
173.836	1791	108	159	0.087
173.923	1792	108.1	158	0.061
173.984	1793	108.2	157	0.036
174.02	1794	108.3	156	0.038
174.058	1795	108.4	155	0.065
174.123	1796	108.5	154	0.053
174.176	1797	108.6	153	0.042
174.218	1798	108.7	152	0.041
174.259	1799	108.8	151	0.036
174.295	1800	108.9	150	0.103
174.398	1801	109	149	0.035
174.433	1802	109.1	148	0.072
174.505	1803	109.2	147	0.072
174.577	1804	109.3	146	0.081
174.658	1805	109.4	145	0.078
174.736	1806	109.5	144	0.057
174.793	1807	109.6	143	0.114
174.907	1808	109.7	142	0.091
174.998	1809	109.8	141	0.013
175.011	1810	109.9	140	0.099
175.11	1811	110	139	0.05
175.16	1812	110.1	138	0.041
175.201	1813	110.2	137	0.054
175.255	1814	110.3	136	0.05
175.305	1815	110.4	135	0.039
175.344	1816	110.5	134	0.09
175.434	1817	110.6	133	0.103
175.537	1818	110.7	132	0.09
175.627	1819	110.8	131	0.05
175.677	1820	110.9	130	0.024
175.701	1821	111	129	0.084
175.785	1822	111.1	128	0.078
175.863	1823	111.2	127	0.046
175.909	1824	111.3	126	0.034
175.943	1825	111.4	125	0.07
176.013	1826	111.5	124	0.104
176.117	1827	111.6	123	0.061
176.178	1828	111.7	122	0.115
176.293	1829	111.8	121	0.036
176.329	1830	111.9	120	0.093
176.422	1831	112	119	0.057
176.479	1832	112.1	118	0.056
176.535	1833	112.2	117	0.1
176.635	1834	112.3	116	0.068
176.703	1835	112.4	115	0.059
176.762	1836	112.5	114	0.037
176.799	1837	112.6	113	0.037
176.836	1838	112.7	112	0.075
176.911	1839	112.8	111	0.046
176.957	1840	112.9	110	0.096
177.053	1841	113	109	0.073
177.126	1842	113.1	108	0.067
177.193	1843	113.2	107	0.053
177.246	1844	113.3	106	0.051
177.297	1845	113.4	105	0.042
177.339	1846	113.5	104	0.036
177.375	1847	113.6	103	0.047
177.422	1848	113.7	102	0.051
177.473	1849	113.8	101	0.063
177.536	1850	113.9	100	0.104
177.64	1851	114	99	0.06
177.7	1852	114.1	98	0.046
177.746	1853	114.2	97	0.067
177.813	1854	114.3	96	0.061
177.874	1855	114.4	95	0.051
177.925	1856	114.5	94	0.05
177.975	1857	114.6	93	0.045
178.02	1858	114.7	92	0.057
178.077	1859	114.8	91	0.032
178.109	1860	114.9	90	0.069
178.178	1861	115	89	0.047
178.225	1862	115.1	88	0.159
178.384	1863	115.2	87	0.101
178.485	1864	115.3	86	0.05
178.535	1865	115.4	85	0.037
178.572	1866	115.5	84	0.125
178.697	1867	115.6	83	0.075
178.772	1868	115.7	82	0.159
178.931	1869	115.8	81	0.054
178.985	1870	115.9	80	0.048
179.033	1871	116	79	0.045
179.078	1872	116.1	78	0.041
179.119	1873	116.2	77	0.048
179.167	1874	116.3	76	0.054
179.221	1875	116.4	75	0.054
179.275	1876	116.5	74	0.077
179.352	1877	116.6	73	0.125
179.477	1878	116.7	72	0.098
179.575	1879	116.8	71	0.04
179.615	1880	116.9	70	0.126
179.741	1881	117	69	0.173
179.914	1882	117.1	68	0.051
179.965	1883	117.2	67	0.096
180.061	1884	117.3	66	0.05
180.111	1885	117.4	65	0.037
180.148	1886	117.5	64	0.09
180.238	1887	117.6	63	0.074
180.312	1888	117.7	62	0.043
180.355	1889	117.8	61	0.081
180.436	1890	117.9	60	0.072
180.508	1891	118	59	0.021
180.529	1892	118.1	58	0.055
180.584	1893	118.2	57	0.035
180.619	1894	118.3	56	0.06
180.679	1895	118.4	55	0.102
180.781	1896	118.5	54	0.059
180.84	1897	118.6	53	0.077
180.917	1898	118.7	52	0.05
180.967	1899	118.8	51	0.03
180.997	1900	118.9	50	0.047
181.044	1901	119	49	0.065
181.109	1902	119.1	48	0.041
181.15	1903	119.2	47	0.077
181.227	1904	119.3	46	0.067
181.294	1905	119.4	45	0.168
181.462	1906	119.5	44	0.097
181.559	1907	119.6	43	0.035
181.594	1908	119.7	42	0.087
181.681	1909	119.8	41	0.055
181.736	1910	119.9	40	0.062
181.798	1911	120	39	0.042
181.84	1912	120.1	38	0.072
181.912	1913	120.2	37	0.112
182.024	1914	120.3	36	0.052
182.076	1915	120.4	35	0.033
182.109	1916	120.5	34	0.063
182.172	1917	120.6	33	0.06
182.232	1918	120.7	32	0.084
182.316	1919	120.8	31	0.071
182.387	1920	120.9	30	0.064
182.451	1921	121	29	0.062
182.513	1922	121.1	28	0.055
182.568	1923	121.2	27	0.049
182.617	1924	121.3	26	0.045
182.662	1925	121.4	25	0.078
182.74	1926	121.5	24	0.081
182.821	1927	121.6	23	0.079
182.9	1928	121.7	22	0.045
182.945	1929	121.8	21	0.039
182.984	1930	121.9	20	0.04
[truncated: 20 more rows]

## Sheet: Additional sulfur isotope data
Sample length [cm]	Top depth [m]	Bottom depth [m]	d34S [permil]	D33S [permil]	SO4 [ppb]	Tie marker [CE]
7	34.78	34.85	17.7868	0.179952	134.57	start of 1835 peak?
5	36.19	36.24	15.04		136.36
5	37.44	37.49	16.81		193.99
7	37.56	37.63	15.6786	-0.0254705	78.3981
7	38.22	38.29	10.9396	0.282995	149.809	1815
7	39.51	39.58	15.1355	-0.0232774	114.324	1809?
7	39.63	39.7	16.4762	0.00928276	134.9
7	40.12	40.19	18.0571	0.0530308	143.097
7	40.32	40.39	17.973	-0.0118041	119.055
7	42.36	42.43	17.7342	-0.0141905	148.43
7	42.79	42.86	18.2359	0.0287906	86.96
7	43.24	43.31	17.7929	0.00632742	126.18
7	43.62	43.69	14.1583	0.0327243	140.181	1762?
5	43.92	43.97	16.17		216.9
5	44.57	44.62	17.4439	-0.015304	138.22
7	44.65	44.72	17.4164	0.0168951	130.939
5	45.08	45.13	16.97		60.32
7	46.8	46.87	18.0937	-0.0142772	184.854
5	75.75	75.8	3.76276	-0.0334185	405.524	1458
5	75.8	75.85	4.89005	0.191138	369.049	1458
5	82.05	82.1	18.17	0.00924675	142.21
5	82.55	82.6	17.8262	-0.0508059	105.43
5	83.82	83.87	16.3064	-0.0729108	122.54
5	84.73	84.78	16.8207	0.0636365	41.23
5	85.18	85.23	18.118	-0.0875976	142.03
5	88.16	88.21	17.21		243.53
5	90.53	90.58	15.89		195.39
5	93.22	93.27	4.47454	-0.401827	145.958	1285
5	93.76	93.83	17.334	-0.0569511	46.9838
5	94.08	94.15	13.3658	-0.0334271	66.5696	1276?
5	94.95	95	17.6522	-0.0043672	193.81
5	95.18	95.23	-4.83772	-1.25593	168.074	1257
5	95.23	95.28	-12.31	-1.36193	138.146	1257
5	95.28	95.33	9.21083	0.39082	430.34	1257
5	95.33	95.38	17.1945	0.927295	275.301	1257
5	96.9	96.95	18.1187	0.00877669	105.026
5	97.43	97.48	4.0701	-0.445608	115.479	1229
5	98.26	98.31	18.793	0.00642186	171.08
5	100.2	100.25	16.6		144.04
5	104.44	104.49	17.0528	-6.99834e-05	155.41
5	106.3	106.35	18.7596	0.034822	190.93
5	107.26	107.31	14.3216	-0.236671	203.58	1110?
5	110.58	110.63	18.76		242.29
